# Supplementary material for: Population Structure and Genetic Diversity of Yunling Cattle Determined by Whole-Genome Resequencing
Source: Genes (Basel). 2023 Nov 27;14(12):2141. doi: 10.3390/genes14122141 (PMC10742670; doi:10.3390/genes14122141)
Supplement: Supplementary file 1 [file genes-14-02141-s001.zip › Supply information-Tables.xlsx]

## Sheet: S1
RUN	LibraryName	BioSample	breed	sex	BioProject	Platform	Model
SRR9721679	CDY408	SAMN12328155	Yunling cattle	female	PRJNA555741	ILLUMINA	Illumina NovaSeq 6000
SRR9721680	CDY410	SAMN12328156	Yunling cattle	female	PRJNA555741	ILLUMINA	Illumina NovaSeq 6000
SRR9721681	CDY396	SAMN12328147	Yunling cattle	female	PRJNA555741	ILLUMINA	Illumina NovaSeq 6000
SRR9721682	CDY397	SAMN12328148	Yunling cattle	female	PRJNA555741	ILLUMINA	Illumina NovaSeq 6000
SRR9721683	CDY399	SAMN12328149	Yunling cattle	female	PRJNA555741	ILLUMINA	Illumina NovaSeq 6000
SRR9721684	CDY400	SAMN12328150	Yunling cattle	female	PRJNA555741	ILLUMINA	Illumina NovaSeq 6000
SRR9721685	CDY402	SAMN12328151	Yunling cattle	female	PRJNA555741	ILLUMINA	Illumina NovaSeq 6000
SRR9721686	CDY403	SAMN12328152	Yunling cattle	female	PRJNA555741	ILLUMINA	Illumina NovaSeq 6000
SRR9721687	CDY404	SAMN12328153	Yunling cattle	female	PRJNA555741	ILLUMINA	Illumina NovaSeq 6000
SRR9721688	CDY405	SAMN12328154	Yunling cattle	female	PRJNA555741	ILLUMINA	Illumina NovaSeq 6000
SRR9721689	CDY195	SAMN12328079	Yunling cattle	female	PRJNA555741	ILLUMINA	Illumina NovaSeq 6000
SRR9721690	CDY274	SAMN12328111	Yunling cattle	female	PRJNA555741	ILLUMINA	Illumina NovaSeq 6000
SRR9721691	CDY279	SAMN12328112	Yunling cattle	female	PRJNA555741	ILLUMINA	Illumina NovaSeq 6000
SRR9721702	CDY388	SAMN12328144	Yunling cattle	female	PRJNA555741	ILLUMINA	Illumina NovaSeq 6000
SRR9721703	CDY387	SAMN12328143	Yunling cattle	female	PRJNA555741	ILLUMINA	Illumina NovaSeq 6000
SRR9721704	CDY380	SAMN12328142	Yunling cattle	female	PRJNA555741	ILLUMINA	Illumina NovaSeq 6000
SRR9721705	CDY375	SAMN12328141	Yunling cattle	female	PRJNA555741	ILLUMINA	Illumina NovaSeq 6000
SRR9721706	CDY374	SAMN12328140	Yunling cattle	female	PRJNA555741	ILLUMINA	Illumina NovaSeq 6000
SRR9721707	CDY371	SAMN12328139	Yunling cattle	female	PRJNA555741	ILLUMINA	Illumina NovaSeq 6000
SRR9721708	CDY369	SAMN12328138	Yunling cattle	female	PRJNA555741	ILLUMINA	Illumina NovaSeq 6000
SRR9721709	CDY367	SAMN12328137	Yunling cattle	female	PRJNA555741	ILLUMINA	Illumina NovaSeq 6000
SRR9721710	CDY270	SAMN12328109	Yunling cattle	female	PRJNA555741	ILLUMINA	Illumina NovaSeq 6000
SRR9721711	CDY272	SAMN12328110	Yunling cattle	female	PRJNA555741	ILLUMINA	Illumina NovaSeq 6000
SRR9721712	CDY264	SAMN12328107	Yunling cattle	female	PRJNA555741	ILLUMINA	Illumina NovaSeq 6000
SRR9721713	CDY267	SAMN12328108	Yunling cattle	female	PRJNA555741	ILLUMINA	Illumina NovaSeq 6000
SRR9721714	CDY280	SAMN12328113	Yunling cattle	female	PRJNA555741	ILLUMINA	Illumina NovaSeq 6000
SRR9721715	CDY281	SAMN12328114	Yunling cattle	female	PRJNA555741	ILLUMINA	Illumina NovaSeq 6000
SRR9721716	CDY394	SAMN12328146	Yunling cattle	female	PRJNA555741	ILLUMINA	Illumina NovaSeq 6000
SRR9721717	CDY389	SAMN12328145	Yunling cattle	female	PRJNA555741	ILLUMINA	Illumina NovaSeq 6000
SRR9721718	CDY263	SAMN12328106	Yunling cattle	female	PRJNA555741	ILLUMINA	Illumina NovaSeq 6000
SRR9721719	CDY261	SAMN12328105	Yunling cattle	female	PRJNA555741	ILLUMINA	Illumina NovaSeq 6000
SRR9721720	CDY339	SAMN12328129	Yunling cattle	female	PRJNA555741	ILLUMINA	Illumina NovaSeq 6000
SRR9721721	CDY344	SAMN12328130	Yunling cattle	female	PRJNA555741	ILLUMINA	Illumina NovaSeq 6000
SRR9721722	CDY337	SAMN12328127	Yunling cattle	female	PRJNA555741	ILLUMINA	Illumina NovaSeq 6000
SRR9721723	CDY338	SAMN12328128	Yunling cattle	female	PRJNA555741	ILLUMINA	Illumina NovaSeq 6000
SRR9721724	CDY357	SAMN12328133	Yunling cattle	female	PRJNA555741	ILLUMINA	Illumina NovaSeq 6000
SRR9721725	CDY358	SAMN12328134	Yunling cattle	female	PRJNA555741	ILLUMINA	Illumina NovaSeq 6000
SRR9721726	CDY351	SAMN12328131	Yunling cattle	female	PRJNA555741	ILLUMINA	Illumina NovaSeq 6000
SRR9721727	CDY353	SAMN12328132	Yunling cattle	female	PRJNA555741	ILLUMINA	Illumina NovaSeq 6000
SRR9721728	CDY359	SAMN12328135	Yunling cattle	female	PRJNA555741	ILLUMINA	Illumina NovaSeq 6000
SRR9721729	CDY365	SAMN12328136	Yunling cattle	female	PRJNA555741	ILLUMINA	Illumina NovaSeq 6000
SRR9721730	CDY217	SAMN12328086	Yunling cattle	female	PRJNA555741	ILLUMINA	Illumina NovaSeq 6000
SRR9721731	CDY216	SAMN12328085	Yunling cattle	female	PRJNA555741	ILLUMINA	Illumina NovaSeq 6000
SRR9721732	CDY251	SAMN12328100	Yunling cattle	female	PRJNA555741	ILLUMINA	Illumina NovaSeq 6000
SRR9721733	CDY250	SAMN12328099	Yunling cattle	female	PRJNA555741	ILLUMINA	Illumina NovaSeq 6000
SRR9721734	CDY255	SAMN12328102	Yunling cattle	female	PRJNA555741	ILLUMINA	Illumina NovaSeq 6000
SRR9721735	CDY252	SAMN12328101	Yunling cattle	female	PRJNA555741	ILLUMINA	Illumina NovaSeq 6000
SRR9721736	CDY207	SAMN12328083	Yunling cattle	female	PRJNA555741	ILLUMINA	Illumina NovaSeq 6000
SRR9721737	CDY257	SAMN12328104	Yunling cattle	female	PRJNA555741	ILLUMINA	Illumina NovaSeq 6000
SRR9721738	CDY256	SAMN12328103	Yunling cattle	female	PRJNA555741	ILLUMINA	Illumina NovaSeq 6000
SRR9721739	CDY310	SAMN12328118	Yunling cattle	female	PRJNA555741	ILLUMINA	Illumina NovaSeq 6000
SRR9721740	CDY309	SAMN12328117	Yunling cattle	female	PRJNA555741	ILLUMINA	Illumina NovaSeq 6000
SRR9721741	CDY320	SAMN12328120	Yunling cattle	female	PRJNA555741	ILLUMINA	Illumina NovaSeq 6000
SRR9721742	CDY315	SAMN12328119	Yunling cattle	female	PRJNA555741	ILLUMINA	Illumina NovaSeq 6000
SRR9721743	CDY326	SAMN12328122	Yunling cattle	female	PRJNA555741	ILLUMINA	Illumina NovaSeq 6000
SRR9721744	CDY323	SAMN12328121	Yunling cattle	female	PRJNA555741	ILLUMINA	Illumina NovaSeq 6000
SRR9721745	CDY333	SAMN12328124	Yunling cattle	female	PRJNA555741	ILLUMINA	Illumina NovaSeq 6000
SRR9721746	CDY328	SAMN12328123	Yunling cattle	female	PRJNA555741	ILLUMINA	Illumina NovaSeq 6000
SRR9721747	CDY335	SAMN12328126	Yunling cattle	female	PRJNA555741	ILLUMINA	Illumina NovaSeq 6000
SRR9721748	CDY334	SAMN12328125	Yunling cattle	female	PRJNA555741	ILLUMINA	Illumina NovaSeq 6000
SRR9721749	CDY219	SAMN12328087	Yunling cattle	female	PRJNA555741	ILLUMINA	Illumina NovaSeq 6000
SRR9721750	CDY220	SAMN12328088	Yunling cattle	female	PRJNA555741	ILLUMINA	Illumina NovaSeq 6000
SRR9721751	CDY224	SAMN12328089	Yunling cattle	female	PRJNA555741	ILLUMINA	Illumina NovaSeq 6000
SRR9721752	CDY227	SAMN12328090	Yunling cattle	female	PRJNA555741	ILLUMINA	Illumina NovaSeq 6000
SRR9721753	CDY249	SAMN12328098	Yunling cattle	female	PRJNA555741	ILLUMINA	Illumina NovaSeq 6000
SRR9721754	CDY228	SAMN12328091	Yunling cattle	female	PRJNA555741	ILLUMINA	Illumina NovaSeq 6000
SRR9721755	CDY234	SAMN12328092	Yunling cattle	female	PRJNA555741	ILLUMINA	Illumina NovaSeq 6000
SRR9721756	CDY077	SAMN12328066	Yunling cattle	female	PRJNA555741	ILLUMINA	Illumina NovaSeq 6000
SRR9721757	CDY075	SAMN12328065	Yunling cattle	female	PRJNA555741	ILLUMINA	Illumina NovaSeq 6000
SRR9721758	CDY058	SAMN12328062	Yunling cattle	female	PRJNA555741	ILLUMINA	Illumina NovaSeq 6000
SRR9721759	CDY056	SAMN12328061	Yunling cattle	female	PRJNA555741	ILLUMINA	Illumina NovaSeq 6000
SRR9721760	CDY069	SAMN12328064	Yunling cattle	female	PRJNA555741	ILLUMINA	Illumina NovaSeq 6000
SRR9721761	CDY061	SAMN12328063	Yunling cattle	female	PRJNA555741	ILLUMINA	Illumina NovaSeq 6000
SRR9721762	CDY050	SAMN12328058	Yunling cattle	female	PRJNA555741	ILLUMINA	Illumina NovaSeq 6000
SRR9721763	CDY044	SAMN12328057	Yunling cattle	female	PRJNA555741	ILLUMINA	Illumina NovaSeq 6000
SRR9721764	CDY055	SAMN12328060	Yunling cattle	female	PRJNA555741	ILLUMINA	Illumina NovaSeq 6000
SRR9721765	CDY052	SAMN12328059	Yunling cattle	female	PRJNA555741	ILLUMINA	Illumina NovaSeq 6000
SRR9721766	CDY241	SAMN12328095	Yunling cattle	female	PRJNA555741	ILLUMINA	Illumina NovaSeq 6000
SRR9721767	CDY248	SAMN12328097	Yunling cattle	female	PRJNA555741	ILLUMINA	Illumina NovaSeq 6000
SRR9721768	CDY245	SAMN12328096	Yunling cattle	female	PRJNA555741	ILLUMINA	Illumina NovaSeq 6000
SRR9721777	CDY110	SAMN12328075	Yunling cattle	female	PRJNA555741	ILLUMINA	Illumina NovaSeq 6000
SRR9721778	CDY132	SAMN12328076	Yunling cattle	female	PRJNA555741	ILLUMINA	Illumina NovaSeq 6000
SRR9721779	CDY093	SAMN12328073	Yunling cattle	female	PRJNA555741	ILLUMINA	Illumina NovaSeq 6000
SRR9721780	CDY106	SAMN12328074	Yunling cattle	female	PRJNA555741	ILLUMINA	Illumina NovaSeq 6000
SRR9721781	CDY089	SAMN12328071	Yunling cattle	female	PRJNA555741	ILLUMINA	Illumina NovaSeq 6000
SRR9721782	CDY090	SAMN12328072	Yunling cattle	female	PRJNA555741	ILLUMINA	Illumina NovaSeq 6000
SRR9721783	CDY087	SAMN12328069	Yunling cattle	female	PRJNA555741	ILLUMINA	Illumina NovaSeq 6000
SRR9721784	CDY088	SAMN12328070	Yunling cattle	female	PRJNA555741	ILLUMINA	Illumina NovaSeq 6000
SRR9721785	CDY081	SAMN12328067	Yunling cattle	female	PRJNA555741	ILLUMINA	Illumina NovaSeq 6000
SRR9721786	CDY086	SAMN12328068	Yunling cattle	female	PRJNA555741	ILLUMINA	Illumina NovaSeq 6000
SRR9721787	CDY235	SAMN12328093	Yunling cattle	female	PRJNA555741	ILLUMINA	Illumina NovaSeq 6000
SRR9721790	CDY472	SAMN12328178	Yunling cattle	female	PRJNA555741	ILLUMINA	Illumina NovaSeq 6000
SRR9721791	CDY469	SAMN12328177	Yunling cattle	female	PRJNA555741	ILLUMINA	Illumina NovaSeq 6000
SRR9721796	CDY206	SAMN12328082	Yunling cattle	female	PRJNA555741	ILLUMINA	Illumina NovaSeq 6000
SRR9721809	CDY201	SAMN12328080	Yunling cattle	female	PRJNA555741	ILLUMINA	Illumina NovaSeq 6000
SRR9721812	CDY204	SAMN12328081	Yunling cattle	female	PRJNA555741	ILLUMINA	Illumina NovaSeq 6000
SRR9721821	CDY240	SAMN12328094	Yunling cattle	female	PRJNA555741	ILLUMINA	Illumina NovaSeq 6000
SRR9721822	CDY463	SAMN12328175	Yunling cattle	female	PRJNA555741	ILLUMINA	Illumina NovaSeq 6000
SRR9721823	CDY467	SAMN12328176	Yunling cattle	female	PRJNA555741	ILLUMINA	Illumina NovaSeq 6000
SRR9721824	CDY457	SAMN12328173	Yunling cattle	female	PRJNA555741	ILLUMINA	Illumina NovaSeq 6000
SRR9721825	CDY460	SAMN12328174	Yunling cattle	female	PRJNA555741	ILLUMINA	Illumina NovaSeq 6000
SRR9721826	CDY449	SAMN12328171	Yunling cattle	female	PRJNA555741	ILLUMINA	Illumina NovaSeq 6000
SRR9721827	CDY451	SAMN12328172	Yunling cattle	female	PRJNA555741	ILLUMINA	Illumina NovaSeq 6000
SRR9721828	CDY443	SAMN12328169	Yunling cattle	female	PRJNA555741	ILLUMINA	Illumina NovaSeq 6000
SRR9721829	CDY444	SAMN12328170	Yunling cattle	female	PRJNA555741	ILLUMINA	Illumina NovaSeq 6000
SRR9721830	CDY437	SAMN12328167	Yunling cattle	female	PRJNA555741	ILLUMINA	Illumina NovaSeq 6000
SRR9721831	CDY441	SAMN12328168	Yunling cattle	female	PRJNA555741	ILLUMINA	Illumina NovaSeq 6000
SRR9721832	CDY026	SAMN12328051	Yunling cattle	female	PRJNA555741	ILLUMINA	Illumina NovaSeq 6000
SRR9721833	CDY028	SAMN12328052	Yunling cattle	female	PRJNA555741	ILLUMINA	Illumina NovaSeq 6000
SRR9721834	CDY029	SAMN12328053	Yunling cattle	female	PRJNA555741	ILLUMINA	Illumina NovaSeq 6000
SRR9721837	CDY006	SAMN12328048	Yunling cattle	female	PRJNA555741	ILLUMINA	Illumina NovaSeq 6000
SRR9721838	CDY016	SAMN12328049	Yunling cattle	female	PRJNA555741	ILLUMINA	Illumina NovaSeq 6000
SRR9721839	CDY023	SAMN12328050	Yunling cattle	female	PRJNA555741	ILLUMINA	Illumina NovaSeq 6000
SRR9721840	CDY035	SAMN12328055	Yunling cattle	female	PRJNA555741	ILLUMINA	Illumina NovaSeq 6000
SRR9721841	CDY041	SAMN12328056	Yunling cattle	female	PRJNA555741	ILLUMINA	Illumina NovaSeq 6000
SRR9721842	CDY433	SAMN12328166	Yunling cattle	female	PRJNA555741	ILLUMINA	Illumina NovaSeq 6000
SRR9721843	CDY430	SAMN12328165	Yunling cattle	female	PRJNA555741	ILLUMINA	Illumina NovaSeq 6000
SRR9721844	CDY426	SAMN12328162	Yunling cattle	female	PRJNA555741	ILLUMINA	Illumina NovaSeq 6000
SRR9721845	CDY422	SAMN12328161	Yunling cattle	female	PRJNA555741	ILLUMINA	Illumina NovaSeq 6000
SRR9721846	CDY429	SAMN12328164	Yunling cattle	female	PRJNA555741	ILLUMINA	Illumina NovaSeq 6000
SRR9721847	CDY427	SAMN12328163	Yunling cattle	female	PRJNA555741	ILLUMINA	Illumina NovaSeq 6000
SRR9721848	CDY416	SAMN12328158	Yunling cattle	female	PRJNA555741	ILLUMINA	Illumina NovaSeq 6000
SRR9721849	CDY413	SAMN12328157	Yunling cattle	female	PRJNA555741	ILLUMINA	Illumina NovaSeq 6000
SRR9721850	CDY420	SAMN12328160	Yunling cattle	female	PRJNA555741	ILLUMINA	Illumina NovaSeq 6000
SRR9721851	CDY418	SAMN12328159	Yunling cattle	female	PRJNA555741	ILLUMINA	Illumina NovaSeq 6000
SRR9721852	CDY161	SAMN12328078	Yunling cattle	female	PRJNA555741	ILLUMINA	Illumina NovaSeq 6000
SRR9721853	CDY284	SAMN12328115	Yunling cattle	female	PRJNA555741	ILLUMINA	Illumina NovaSeq 6000
SRR9721854	CDY286	SAMN12328116	Yunling cattle	female	PRJNA555741	ILLUMINA	Illumina NovaSeq 6000
SRR9721855	CDY138	SAMN12328077	Yunling cattle	female	PRJNA555741	ILLUMINA	Illumina NovaSeq 6000

## Sheet: S2
BioSample	RUN	map rate	primary mapped rate
SAMN12328155	SRR9721679	0.9972	0.9972
SAMN12328156	SRR9721680	0.9971	0.9971
SAMN12328147	SRR9721681	0.9978	0.9978
SAMN12328148	SRR9721682	0.9975	0.9975
SAMN12328149	SRR9721683	0.9979	0.9979
SAMN12328150	SRR9721684	0.9975	0.9975
SAMN12328151	SRR9721685	0.9974	0.9974
SAMN12328152	SRR9721686	0.9976	0.9976
SAMN12328153	SRR9721687	0.9953	0.9953
SAMN12328154	SRR9721688	0.9975	0.9975
SAMN12328079	SRR9721689	0.9974	0.9974
SAMN12328111	SRR9721690	0.9968	0.9968
SAMN12328112	SRR9721691	0.9969	0.9969
SAMN12328144	SRR9721702	0.9978	0.9978
SAMN12328143	SRR9721703	0.9979	0.9978
SAMN12328142	SRR9721704	0.9975	0.9975
SAMN12328141	SRR9721705	0.9974	0.9974
SAMN12328140	SRR9721706	0.9978	0.9978
SAMN12328139	SRR9721707	0.9973	0.9973
SAMN12328138	SRR9721708	0.9977	0.9977
SAMN12328137	SRR9721709	0.9932	0.9932
SAMN12328109	SRR9721710	0.9966	0.9966
SAMN12328110	SRR9721711	0.9971	0.9971
SAMN12328107	SRR9721712	0.9976	0.9976
SAMN12328108	SRR9721713	0.9971	0.9971
SAMN12328113	SRR9721714	0.9971	0.9971
SAMN12328114	SRR9721715	0.9972	0.9972
SAMN12328146	SRR9721716	0.9976	0.9976
SAMN12328145	SRR9721717	0.9974	0.9974
SAMN12328106	SRR9721718	0.9971	0.9971
SAMN12328105	SRR9721719	0.9967	0.9967
SAMN12328129	SRR9721720	0.9976	0.9976
SAMN12328130	SRR9721721	0.9971	0.9971
SAMN12328127	SRR9721722	0.9966	0.9966
SAMN12328128	SRR9721723	0.9966	0.9966
SAMN12328133	SRR9721724	0.9977	0.9977
SAMN12328134	SRR9721725	0.9978	0.9977
SAMN12328131	SRR9721726	0.9963	0.9963
SAMN12328132	SRR9721727	0.9963	0.9963
SAMN12328135	SRR9721728	0.9974	0.9974
SAMN12328136	SRR9721729	0.9978	0.9978
SAMN12328086	SRR9721730	0.9975	0.9975
SAMN12328085	SRR9721731	0.9978	0.9978
SAMN12328100	SRR9721732	0.9928	0.9928
SAMN12328099	SRR9721733	0.9972	0.9971
SAMN12328102	SRR9721734	0.9968	0.9968
SAMN12328101	SRR9721735	0.9976	0.9976
SAMN12328083	SRR9721736	0.9974	0.9974
SAMN12328104	SRR9721737	0.9972	0.9972
SAMN12328103	SRR9721738	0.9973	0.9973
SAMN12328118	SRR9721739	0.9973	0.9973
SAMN12328117	SRR9721740	0.9961	0.9961
SAMN12328120	SRR9721741	0.9976	0.9975
SAMN12328119	SRR9721742	0.9969	0.9969
SAMN12328122	SRR9721743	0.9971	0.9971
SAMN12328121	SRR9721744	0.9971	0.9971
SAMN12328124	SRR9721745	0.9971	0.9971
SAMN12328123	SRR9721746	0.9969	0.9968
SAMN12328126	SRR9721747	0.9973	0.9972
SAMN12328125	SRR9721748	0.9976	0.9976
SAMN12328087	SRR9721749	0.998	0.998
SAMN12328088	SRR9721750	0.9979	0.9978
SAMN12328089	SRR9721751	0.9975	0.9975
SAMN12328090	SRR9721752	0.9971	0.9971
SAMN12328098	SRR9721753	0.9957	0.9957
SAMN12328091	SRR9721754	0.9981	0.9981
SAMN12328092	SRR9721755	0.9978	0.9977
SAMN12328066	SRR9721756	0.9969	0.9969
SAMN12328065	SRR9721757	0.9968	0.9968
SAMN12328062	SRR9721758	0.9975	0.9975
SAMN12328061	SRR9721759	0.997	0.997
SAMN12328064	SRR9721760	0.9971	0.997
SAMN12328063	SRR9721761	0.9973	0.9973
SAMN12328058	SRR9721762	0.9972	0.9972
SAMN12328057	SRR9721763	0.9974	0.9973
SAMN12328060	SRR9721764	0.9975	0.9975
SAMN12328059	SRR9721765	0.9972	0.9971
SAMN12328095	SRR9721766	0.9977	0.9977
SAMN12328097	SRR9721767	0.9974	0.9974
SAMN12328096	SRR9721768	0.9976	0.9976
SAMN12328075	SRR9721777	0.9977	0.9977
SAMN12328076	SRR9721778	0.9979	0.9979
SAMN12328073	SRR9721779	0.9976	0.9976
SAMN12328074	SRR9721780	0.9974	0.9973
SAMN12328071	SRR9721781	0.9975	0.9975
SAMN12328072	SRR9721782	0.9972	0.9972
SAMN12328069	SRR9721783	0.9962	0.9962
SAMN12328070	SRR9721784	0.9974	0.9973
SAMN12328067	SRR9721785	0.9978	0.9978
SAMN12328068	SRR9721786	0.9974	0.9974
SAMN12328093	SRR9721787	0.996	0.9959
SAMN12328178	SRR9721790	0.9973	0.9973
SAMN12328177	SRR9721791	0.9976	0.9976
SAMN12328082	SRR9721796	0.9975	0.9975
SAMN12328080	SRR9721809	0.9978	0.9978
SAMN12328081	SRR9721812	0.9978	0.9978
SAMN12328094	SRR9721821	0.9967	0.9966
SAMN12328175	SRR9721822	0.9969	0.9969
SAMN12328176	SRR9721823	0.9975	0.9975
SAMN12328173	SRR9721824	0.997	0.997
SAMN12328174	SRR9721825	0.9977	0.9977
SAMN12328171	SRR9721826	0.9973	0.9973
SAMN12328172	SRR9721827	0.9969	0.9969
SAMN12328169	SRR9721828	0.9979	0.9979
SAMN12328170	SRR9721829	0.997	0.997
SAMN12328167	SRR9721830	0.9969	0.9969
SAMN12328168	SRR9721831	0.9967	0.9967
SAMN12328051	SRR9721832	0.9973	0.9973
SAMN12328052	SRR9721833	0.9965	0.9965
SAMN12328053	SRR9721834	0.9975	0.9975
SAMN12328048	SRR9721837	0.9971	0.9971
SAMN12328049	SRR9721838	0.9975	0.9975
SAMN12328050	SRR9721839	0.9973	0.9973
SAMN12328055	SRR9721840	0.9974	0.9974
SAMN12328056	SRR9721841	0.9977	0.9977
SAMN12328166	SRR9721842	0.9976	0.9975
SAMN12328165	SRR9721843	0.9971	0.9971
SAMN12328162	SRR9721844	0.9963	0.9963
SAMN12328161	SRR9721845	0.9976	0.9976
SAMN12328164	SRR9721846	0.9972	0.9972
SAMN12328163	SRR9721847	0.9975	0.9975
SAMN12328158	SRR9721848	0.9975	0.9975
SAMN12328157	SRR9721849	0.9977	0.9977
SAMN12328160	SRR9721850	0.9973	0.9973
SAMN12328159	SRR9721851	0.9975	0.9975
SAMN12328078	SRR9721852	0.9972	0.9972
SAMN12328115	SRR9721853	0.9972	0.9972
SAMN12328116	SRR9721854	0.9973	0.9973
SAMN12328077	SRR9721855	0.9978	0.9978
		0.997211	0.997198

## Sheet: S3
BioSample	admixture2	NJ-Tree	PCA
SAMN12328155	2	2	2
SAMN12328156	2	2	2
SAMN12328147	2	2	2
SAMN12328148	2	2	2
SAMN12328149	2	2	2
SAMN12328150	2	2	2
SAMN12328151	2	2	2
SAMN12328152	2	2	2
SAMN12328153	2	2	2
SAMN12328154	2	2	2
SAMN12328079	2	2	2
SAMN12328111	2	2	2
SAMN12328112	2	2	1
SAMN12328144	2	2	2
SAMN12328143	2	2	2
SAMN12328142	2	2	2
SAMN12328141	2	2	2
SAMN12328140	2	2	2
SAMN12328139	2	2	2
SAMN12328138	2	2	2
SAMN12328137	2	2	2
SAMN12328109	1	1	1
SAMN12328110	2	2	2
SAMN12328107	2	2	2
SAMN12328108	2	2	2
SAMN12328113	1	1	1
SAMN12328114	2	2	2
SAMN12328146	1	1	1
SAMN12328145	2	2	2
SAMN12328106	2	2	2
SAMN12328105	1	2	1
SAMN12328129	2	2	2
SAMN12328130	2	2	2
SAMN12328127	1	1	1
SAMN12328128	2	2	2
SAMN12328133	1	1	1
SAMN12328134	2	2	2
SAMN12328131	2	2	2
SAMN12328132	2	2	2
SAMN12328135	2	2	2
SAMN12328136	1	1	1
SAMN12328086	1	1	1
SAMN12328085	2	2	2
SAMN12328100	1	1	1
SAMN12328099	2	2	1
SAMN12328102	1	1	1
SAMN12328101	2	2	2
SAMN12328083	1	1	1
SAMN12328104	2	2	2
SAMN12328103	1	1	1
SAMN12328118	1	2	1
SAMN12328117	2	2	2
SAMN12328120	1	1	1
SAMN12328119	2	2	2
SAMN12328122	2	2	2
SAMN12328121	2	2	2
SAMN12328124	2	2	2
SAMN12328123	2	2	2
SAMN12328126	1	1	1
SAMN12328125	2	2	2
SAMN12328087	1	1	1
SAMN12328088	2	2	2
SAMN12328089	2	2	2
SAMN12328090	1	1	1
SAMN12328098	2	2	2
SAMN12328091	2	2	2
SAMN12328092	1	1	1
SAMN12328066	2	2	2
SAMN12328065	2	2	1
SAMN12328062	1	1	1
SAMN12328061	2	2	2
SAMN12328064	1	1	1
SAMN12328063	1	1	1
SAMN12328058	2	2	2
SAMN12328057	2	2	2
SAMN12328060	1	1	1
SAMN12328059	2	2	1
SAMN12328095	1	1	1
SAMN12328097	2	2	2
SAMN12328096	1	1	1
SAMN12328075	2	2	2
SAMN12328076	2	2	2
SAMN12328073	2	2	2
SAMN12328074	2	2	2
SAMN12328071	2	2	2
SAMN12328072	1	1	1
SAMN12328069	2	2	2
SAMN12328070	2	2	2
SAMN12328067	1	1	1
SAMN12328068	2	2	2
SAMN12328093	2	2	2
SAMN12328178	1	1	2
SAMN12328177	2	2	2
SAMN12328082	2	2	2
SAMN12328080	2	2	2
SAMN12328081	2	2	2
SAMN12328094	2	2	2
SAMN12328175	2	2	2
SAMN12328176	1	1	1
SAMN12328173	2	2	2
SAMN12328174	2	2	2
SAMN12328171	2	2	2
SAMN12328172	2	2	2
SAMN12328169	2	2	2
SAMN12328170	2	2	2
SAMN12328167	2	2	2
SAMN12328168	2	2	2
SAMN12328051	2	2	1
SAMN12328052	2	2	1
SAMN12328053	2	2	2
SAMN12328048	2	2	1
SAMN12328049	2	2	2
SAMN12328050	2	2	2
SAMN12328055	2	2	1
SAMN12328056	1	1	1
SAMN12328166	2	2	2
SAMN12328165	2	2	2
SAMN12328162	2	2	2
SAMN12328161	2	2	2
SAMN12328164	2	2	2
SAMN12328163	2	2	2
SAMN12328158	2	2	2
SAMN12328157	2	2	2
SAMN12328160	2	2	2
SAMN12328159	2	2	2
SAMN12328078	2	2	1
SAMN12328115	2	2	1
SAMN12328116	1	1	1
SAMN12328077	2	2	1
