# Supplementary figures and images for: Population Structure and Genetic Diversity of Yunling Cattle Determined by Whole-Genome Resequencing
Source: MDPI journal article supplement (doi:10.3390/genes14122141), 2023-11-27

Figure S1 density plots for filtered SNP quality

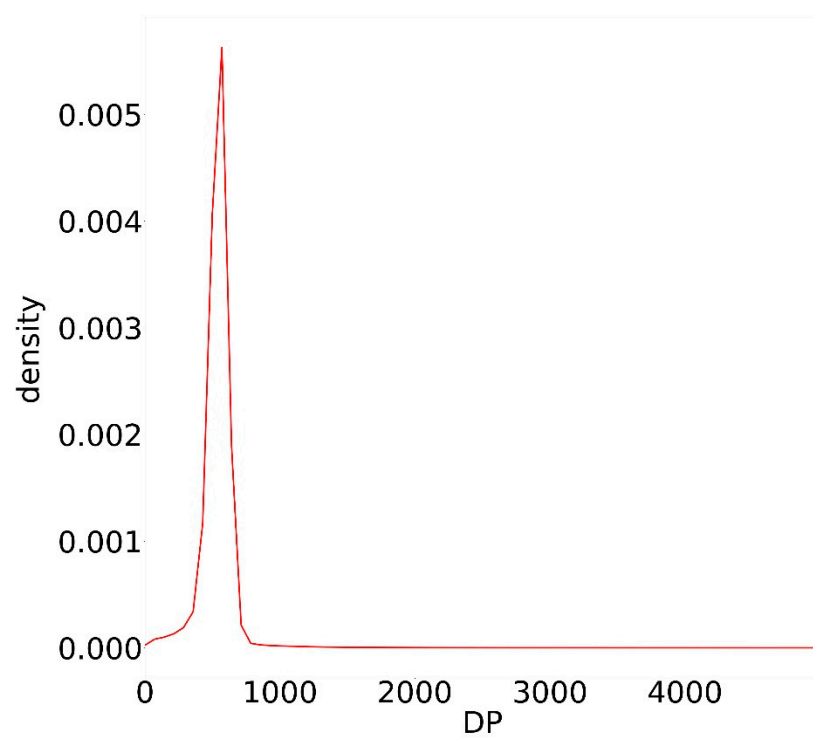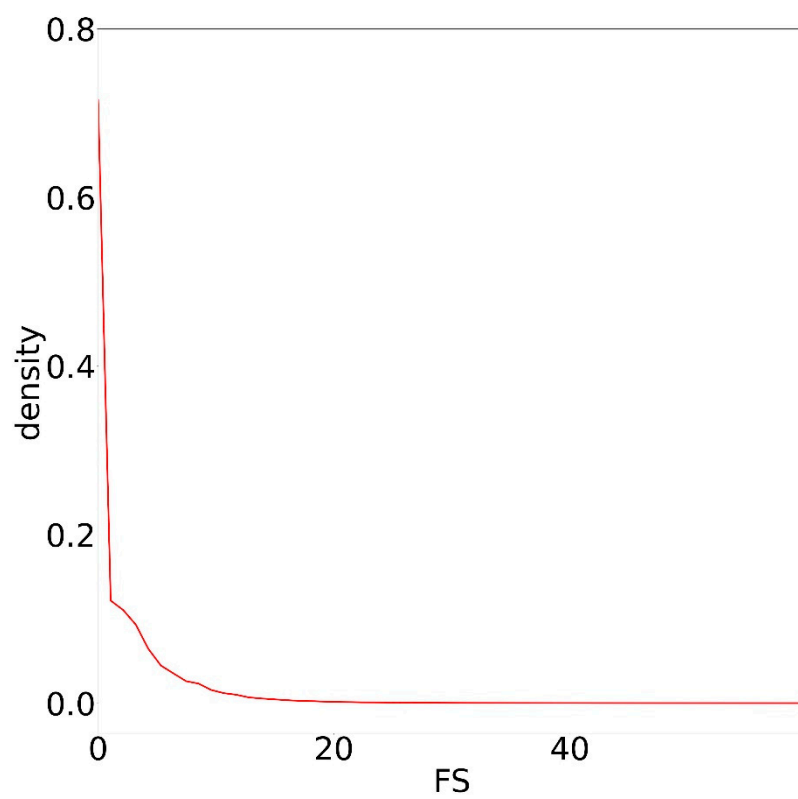

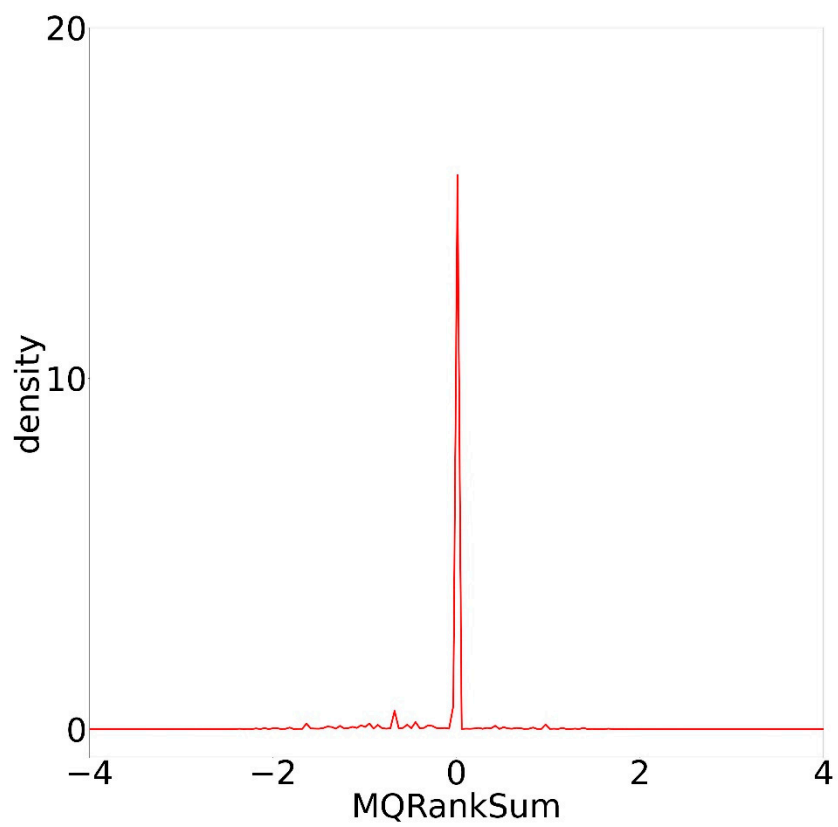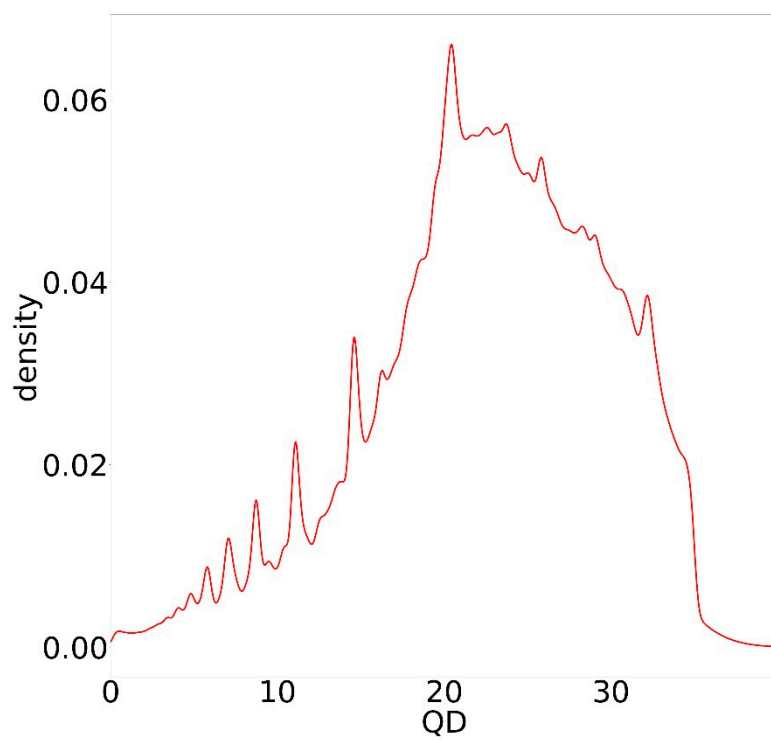

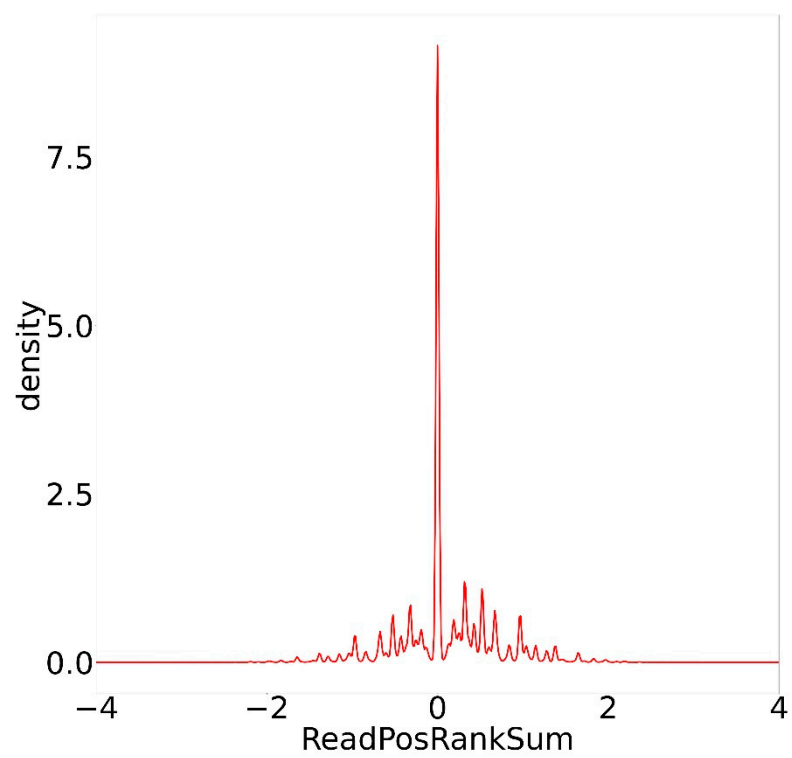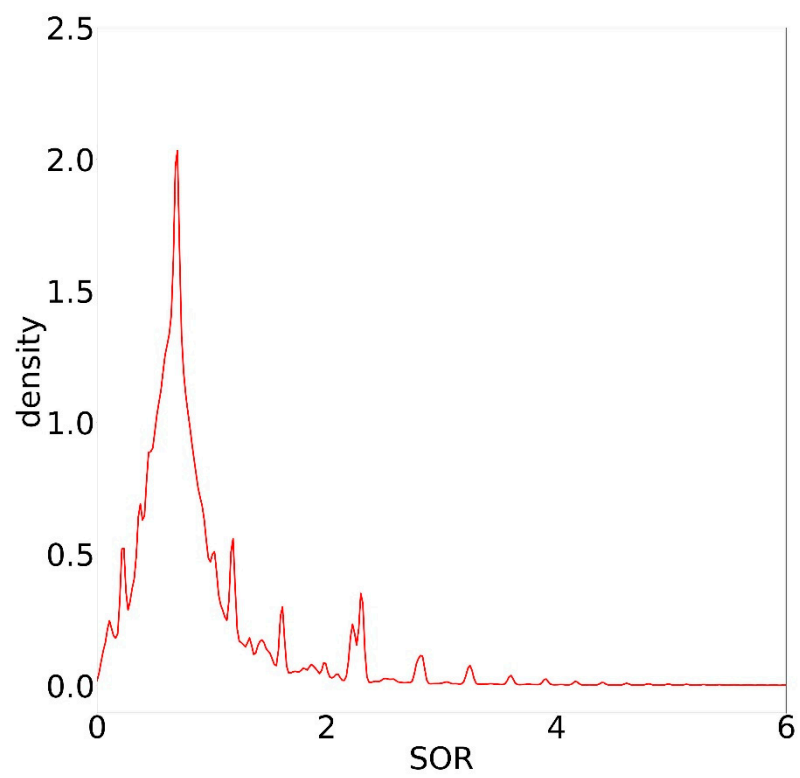

Figure S2 Distribution of SNPs on chromosomes

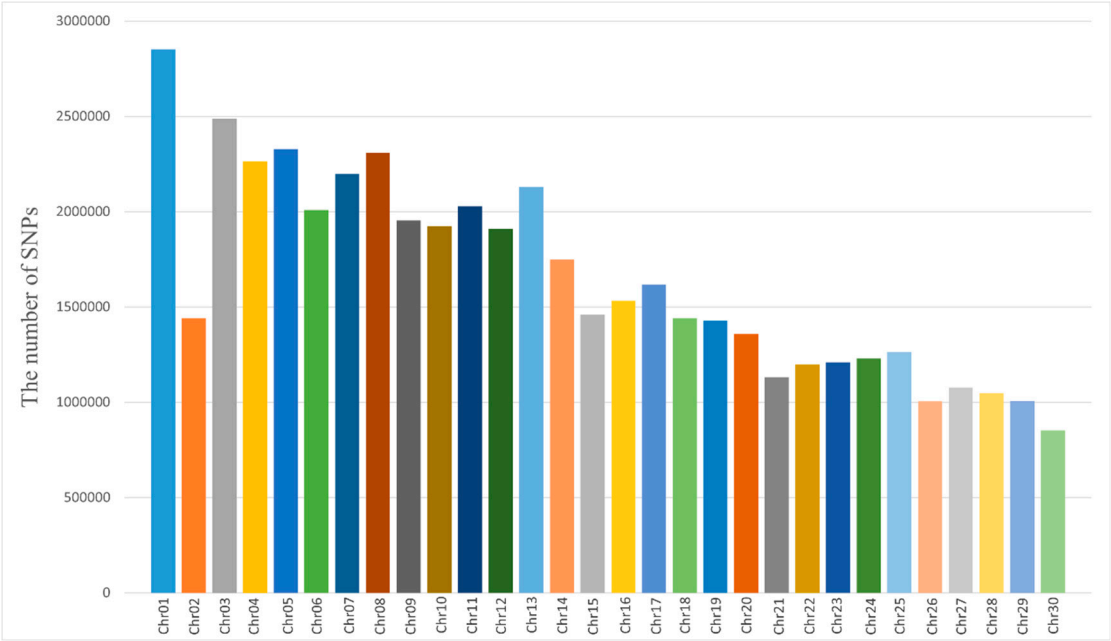

Supplement: s1 [file s1]
